# Supplementary material
Source: ML conference proceedings conference paper supplement (https://openreview.net/forum?id=vvSPyGfZre6)
Supplement: supplementary_material [file attachment]

# NEURAL CELLULAR AUTOMATA MANIFOLD: SUPPLEMENTARY MATERIAL

**Anonymous authors**

Paper under double-blind review

## Dataset Splits

In the file splits.yaml we provide the file list for the Emoji dataset splits, used in the experiments section. We will also provide a downloading script with the source code that will be published after the review process.

## Grow Videos

The following videos show how a emoji is grown by a trained NCAM model step by step.

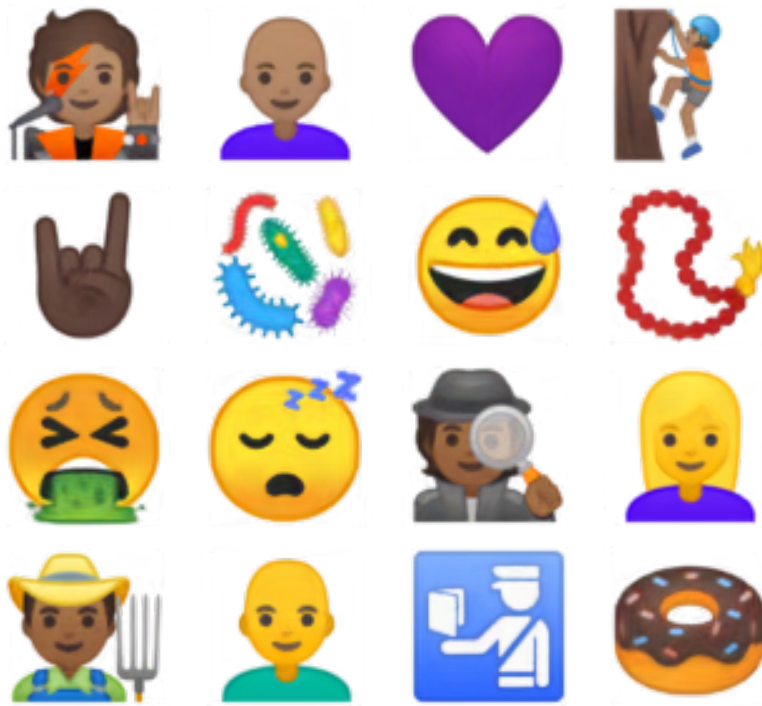

Table 1: Videos taken from the output of the DNA-SYN model

## Training Videos

The following videos compile the training process of two different splits of the Emoji Dataset. Each Frame is a snapshot of the state of the network after a optimization step.

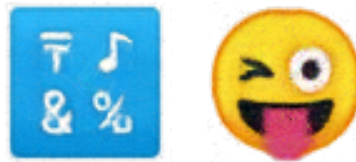

Table 2: Chars Split and Emos Split, click on the emoji to play the video
